# Supplementary material for: The dynamic proteome of influenza A virus infection identifies M segment splicing as a host range determinant
Source: PubMed Central journal article supplement (PMC6892822; doi:10.1038/s41467-019-13520-8), 2019-12-04
Supplement: 41467_2019_13520_MOESM4_ESM.pdf [file 41467_2019_13520_MOESM4_ESM.pdf]

## **Description of Additional Supplementary Files**

File Name: Supplementary Data 1

Description: protein level data virus and host

File Name: Supplementary Data 2

Description: Enriched gene ontology terms across the course of infection

File Name: Supplementary Data 3

Description: Nucleotide and amino acid differences at the 3' splice site region
